# Supplementary material for: Photocatalytic oxidative cyclization of aromatic thioamides catalyzed by Cu2O rhombic dodecahedra
Source: Royal Society of Chemistry journal article supplement (doi:10.1039/d3ta08126e), 2024-01-01
Supplement: d3ta08126e1.pdf [file d3ta08126e1.pdf]

## Electronic Supplementary Information

### **Photocatalytic oxidative cyclization of aromatic thioamides catalyzed by Cu<sub>2</sub>O rhombic dodecahedra**

Guan-Ru Wang and Michael H. Huang\*

Department of Chemistry, National Tsing Hua University, Hsinchu 300044, Taiwan

E-mail: hyhuang@mx.nthu.edu.tw

### **Synthesis of polyhedral Cu<sub>2</sub>O crystals**

For the synthesis of Cu<sub>2</sub>O cubes, 38.2 mL of deionized water was added to dissolve 0.348 g of SDS. The mixture was stirred at 31 °C for 5 min. After adding 0.4 mL of 0.1 M CuCl<sub>2</sub> solution, the mixture was kept stirring for 25 min. Next, 0.8 mL of 1.0 M NaOH solution was added and stirred for 5 sec, then quickly added 0.6 mL of 0.2 M NH<sub>2</sub>OH·HCl solution and stirred for 20 sec. After stop stirring, the solution was aged for 50 min.

To make Cu<sub>2</sub>O rhombic dodecahedra, 27.68 mL of deionized water was added to dissolve 0.348 g of SDS. The mixture was stirred at 31 °C for 5 min. After adding 2.0 mL of 0.1 M CuCl<sub>2</sub> solution, the mixture was kept stirring for 25 min. Next, 0.72 mL of 1.0 M NaOH solution was added and stirred for 4 sec, followed by the introduction of 9.6 mL of 0.1 M NH<sub>2</sub>OH·HCl solution and stirred for 20 sec. After stop stirring, the solution was aged for 50 min.

For the formation of Cu<sub>2</sub>O octahedra, 26.20 mL of deionized water was added to dissolve 0.348 g of SDS. The mixture was stirred at 31 °C for 5 min. After adding 0.8 mL of 0.1 M CuCl<sub>2</sub> solution, the mixture was kept stirring for 10 min. Next, 0.8 mL of 1.0 M NaOH solution was added and stirred for 3 sec. Subsequently, 2.6 mL of 0.2 M NH<sub>2</sub>OH·HCl solution was quickly introduced and stirred for 10 sec. After stop stirring, the solution was aged for 25 min.

After aging, the solution was centrifuged at 10,000 rpm for 3 min. A 1:1 volume ratio of water and ethanol was used to wash the particles. Finally, the particles were stored in absolute ethanol.

### **Radical scavenging experiment**

Rhombic dodecahedral Cu<sub>2</sub>O nanocrystals (2.9 mg), thioamide (0.4 mmol, 1.0 equiv.) and 0.4 mmol DABCO (or 1.0 equiv. of 1,4-benzoquinone, K<sub>2</sub>S<sub>2</sub>O<sub>8</sub>, potassium iodine, sodium oxalate, or isopropyl alcohol) were added to a 15 mL quartz test tube with a stir bar and sealed with a rubber septum. The tube was evacuated using a vacuum pump and refilled with O<sub>2</sub> for three times. After the evacuation and refill cycles, THF was injected into the tube. The mixture was sonicated for 3 min and placed approximately 2 cm from a blue LED lamp (40 W, λ = 390 nm). After the indicated

irradiation period,  $\text{Cu}_2\text{O}$  crystals were separated by centrifugation at 10,000 rpm for 3 min. The solvent was removed by a rotavapor to obtain the crude product. The residue was purified by short column chromatography.

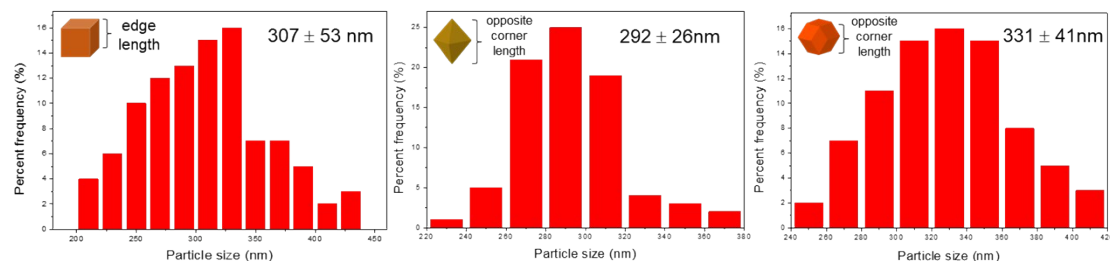

**Fig. S1** Size distribution histograms of the prepared  $\text{Cu}_2\text{O}$  cubes, octahedra, and rhombic dodecahedra.

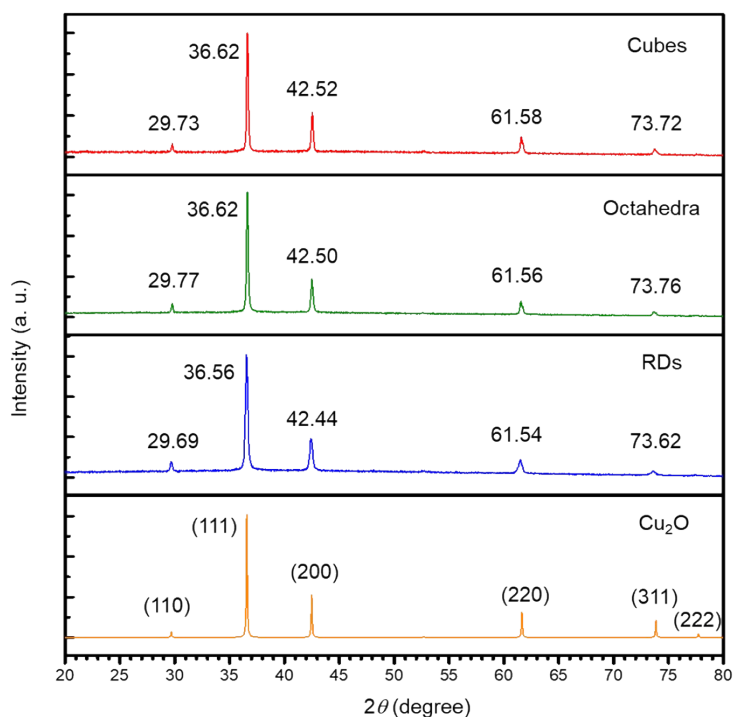

**Fig. S2** XRD patterns of the synthesized  $\text{Cu}_2\text{O}$  crystals. A standard pattern of  $\text{Cu}_2\text{O}$  is also shown.

**Table S1** Calculations for the particle weights needed for the photocatalysis experiment

|                                                     | Cubes                  | Octahedra              | Rhombic dodecahedra    |
|-----------------------------------------------------|------------------------|------------------------|------------------------|
| Size (nm)                                           | 307                    | 292                    | 331                    |
| Surface area for single particle (nm <sup>2</sup> ) | $5.65 \times 10^5$     | $1.48 \times 10^5$     | $4.65 \times 10^5$     |
| Volume for single particle (nm <sup>3</sup> )       | $2.89 \times 10^7$     | $4.15 \times 10^6$     | $2.56 \times 10^7$     |
| Weight for single particle (mg)                     | $1.74 \times 10^{-13}$ | $2.49 \times 10^{-14}$ | $1.54 \times 10^{-13}$ |
| Fixed surface area (nm <sup>2</sup> )               | $8.8 \times 10^{15}$   |                        |                        |
| Number of particles                                 | $1.56 \times 10^{10}$  | $5.96 \times 10^{10}$  | $1.89 \times 10^{10}$  |
| Weight (mg)                                         | <b>2.7</b>             | <b>1.5</b>             | <b>2.9</b>             |

**Table S2** Effect of light wavelength on product yield<sup>a,b</sup>

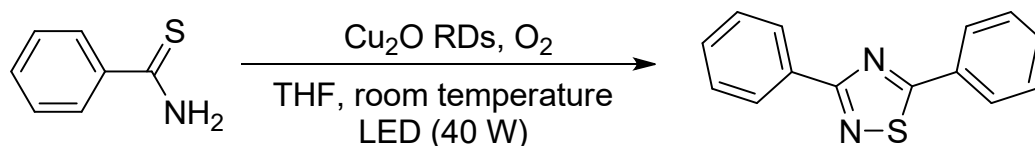

| entry <sup>a</sup> | time (h) | wavelength (nm) | yield (%) <sup>b</sup> |
|--------------------|----------|-----------------|------------------------|
| 1                  | 6        | 390             | 51                     |
| 2                  | 8        | 390             | 94                     |
| 3                  | 8        | 370             | 82                     |
| 4                  | 8        | 440             | 37                     |

<sup>a</sup> Reagents: thiobenzamide (0.4 mmol) and Cu<sub>2</sub>O RDs (2.9 mg) in THF (3 mL).

<sup>b</sup> Isolated yield.

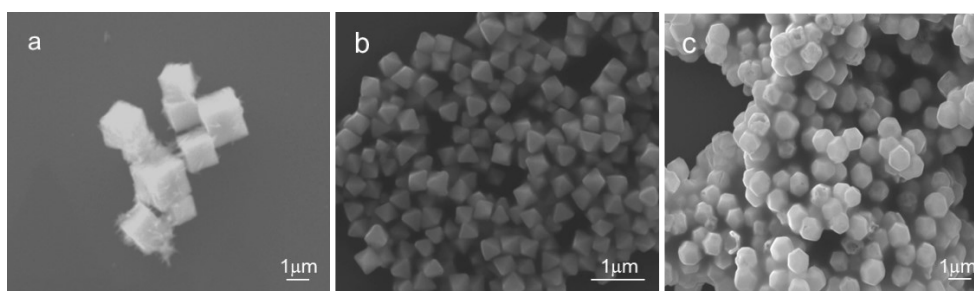

**Fig. S3** SEM images of the Cu<sub>2</sub>O (a) cubes, (b) octahedra and (c) rhombic

dodecahedra after the thiobenzamide cyclization reaction.

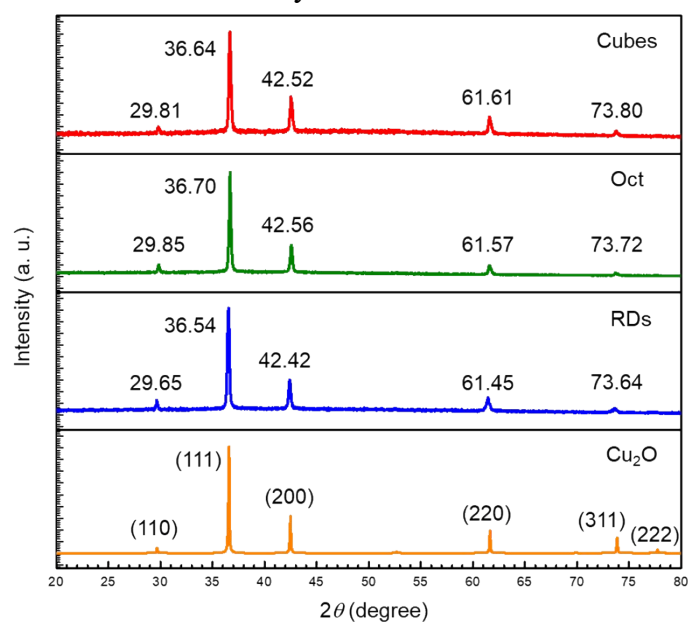

**Fig. S4** XRD patterns of Cu<sub>2</sub>O cubes, octahedra and rhombic dodecahedra after the oxidative thiobenzamide cyclization reaction.

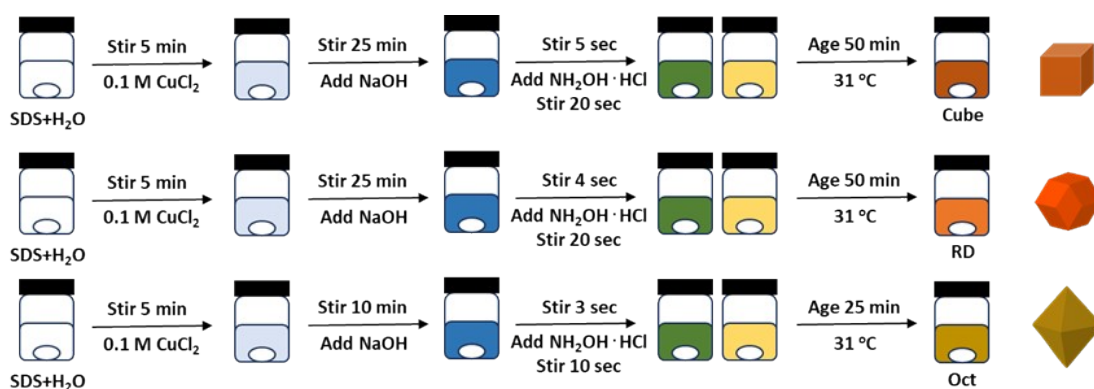

**Fig. S5** Illustration of the Cu<sub>2</sub>O crystal synthesis conditions.

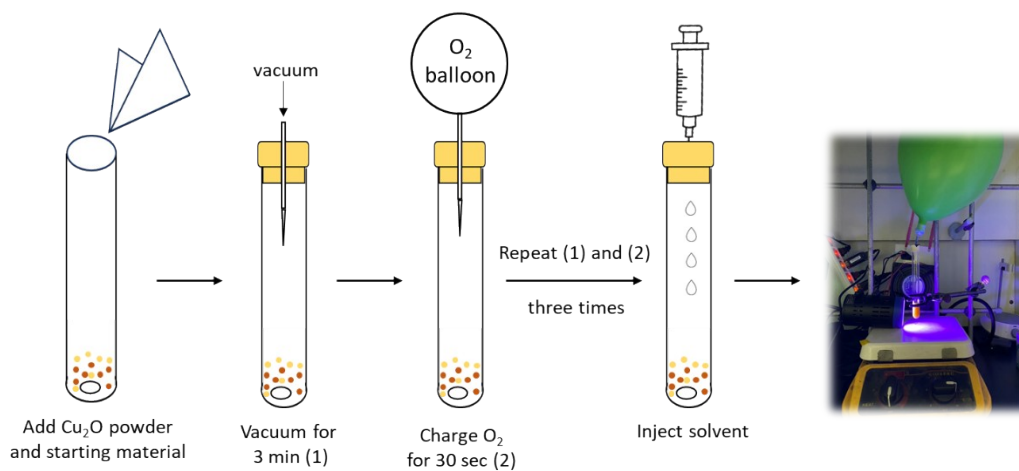

**Fig. S6** Illustration of the steps before photocatalytic oxidative cyclization of

thioamides. The black square-shaped device is a fan.

### Spectroscopic data of isolated products

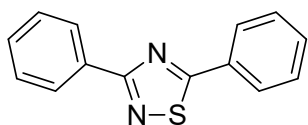

#### 3,5-Diphenyl-1,2,4-thiadiazole (2a)

white solid,  $^1\text{H}$  NMR (400 MHz,  $\text{CDCl}_3$ )  $\delta$  8.42–8.40 (dd,  $J = 7.2, 1.6$  Hz, 2H), 8.07–8.05 (dd,  $J = 7.2, 1.6$  Hz, 2H), 7.54–7.50 (m, 6H).  $^{13}\text{C}$  NMR (100 MHz,  $\text{CDCl}_3$ )  $\delta$  188.1, 173.8, 132.9, 131.9, 130.7, 130.3, 129.2, 128.7, 128.3, 127.5.

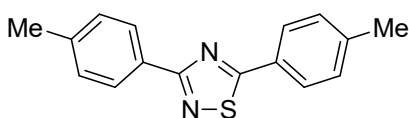

#### 3,5-Bis(4-methylphenyl)-1,2,4-thiadiazole (2b)

white solid,  $^1\text{H}$  NMR (400 MHz,  $\text{CDCl}_3$ )  $\delta$  8.28 (d,  $J = 8.0$  Hz, 2H),  $\delta$  7.94 (d,  $J = 8.4$  Hz, 2H), 7.33–7.30 (m, 4H),  $\delta$  2.43 (d,  $J = 3.2$  Hz, 6H).  $^{13}\text{C}$  NMR (100 MHz,  $\text{CDCl}_3$ )  $\delta$  188.0, 173.8, 142.4, 140.4, 130.4, 129.9, 129.4, 128.3, 128.2, 127.4, 21.6, 21.5.

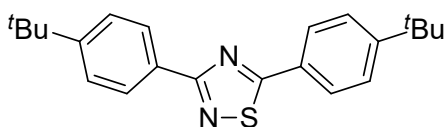

#### 3,5-Bis(4-trimethylphenyl)-1,2,4-thiadiazole (2c)

white solid,  $^1\text{H}$  NMR (400 MHz,  $\text{CDCl}_3$ )  $\delta$  8.35–8.32 (m, 2H),  $\delta$  8.00–7.94 (m, 2H),  $\delta$  7.55–7.53 (dd,  $J = 8.8, 0.8$  Hz, 4H),  $\delta$  1.39 (d,  $J = 3.2$  Hz, 18H).  $^{13}\text{C}$  NMR (100 MHz,  $\text{CDCl}_3$ )  $\delta$  187.8, 173.8, 155.5, 153.5, 130.3, 128.1, 127.3, 126.2, 125.6, 35.1, 34.9, 31.2, 31.1.

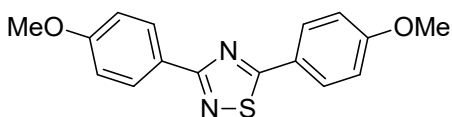

#### 3,5-Bis(4-methoxyphenyl)-1,2,4-thiadiazole (2d)

white solid,  $^1\text{H}$  NMR (400 MHz,  $\text{CDCl}_3$ )  $\delta$  8.32 (d,  $J = 8.8$  Hz, 2H),  $\delta$  7.99 (d,  $J = 8.8$  Hz, 2H),  $\delta$  7.02–6.99 (dd,  $J = 9.2, 2.4$  Hz, 4H),  $\delta$  3.88 (s, 6H).  $^{13}\text{C}$  NMR (100 MHz,  $\text{CDCl}_3$ )  $\delta$  187.4, 173.4, 162.5, 161.3, 129.9, 129.1, 126.1, 123.7, 114.5, 114.0, 55.5, 55.4.

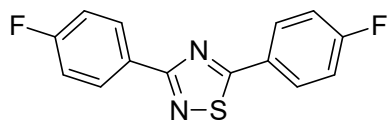

**3,5-Bis(4-fluorophenyl)-1,2,4-thiadiazole (2e)**

white solid,  $^1\text{H}$  NMR (400 MHz,  $\text{CDCl}_3$ )  $\delta$  8.38–8.36 (m, 2H),  $\delta$  8.07–8.02 (m, 2H), 7.25–7.15 (m, 4H).  $^{13}\text{C}$  NMR (100 MHz,  $\text{CDCl}_3$ )  $\delta$  187.0, 172.8, 166.2, 165.5, 163.7, 163.8, 130.5, 130.4, 129.7, 129.6, 116.6, 116.4, 115.8, 115.6.

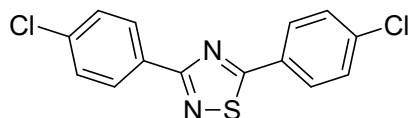

**3,5-Bis(4-chlorophenyl)-1,2,4-thiadiazole (2f)**

white solid,  $^1\text{H}$  NMR (400 MHz,  $\text{CDCl}_3$ )  $\delta$  8.33–8.30 (dd,  $J = 6.8, 2.0$  Hz, 2H),  $\delta$  7.99–7.97 (dd,  $J = 6.4, 1.6$  Hz, 2H), 7.52–7.46 (m, 4H).  $^{13}\text{C}$  NMR (100 MHz,  $\text{CDCl}_3$ )  $\delta$  187.0, 172.8, 138.2, 136.6, 131.2, 129.7, 129.6, 129.0, 128.7.

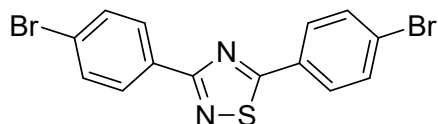

**3,5-Bis(4-bromophenyl)-1,2,4-thiadiazole (2g)**

white solid,  $^1\text{H}$  NMR (400 MHz,  $\text{CDCl}_3$ )  $\delta$  8.24 (d,  $J = 8.4$  Hz, 2H),  $\delta$  7.90 (d,  $J = 6.4$  Hz, 2H),  $\delta$  7.68–7.62 (dd,  $J = 13.2, 8.4$  Hz, 4H).  $^{13}\text{C}$  NMR (100 MHz,  $\text{CDCl}_3$ )  $\delta$  187.2, 172.9, 132.6, 131.9, 131.6, 129.9, 129.4, 128.8, 126.6, 125.1.

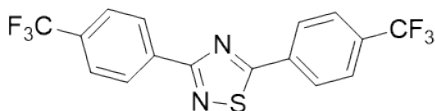

**3,5-Bis(4-trifluoromethylphenyl)-1,2,4-thiadiazole (2h)**

white solid,  $^1\text{H}$  NMR (400 MHz,  $\text{CDCl}_3$ )  $\delta$  8.50 (d,  $J = 6.5$  Hz, 2H),  $\delta$  8.17 (d,  $J = 6.5$  Hz, 2H), 7.76–7.81 (dd,  $J = 13.6, 6.6$  Hz, 4H).  $^{13}\text{C}$  NMR (100 MHz,  $\text{CDCl}_3$ )  $\delta$  187.0, 172.7, 135.6, 134.1, 133.8, 133.6, 133.5, 133.3, 132.6, 132.4, 132.1, 131.8, 128.7, 127.8, 126.4, 125.7, 125.8, 125.1, 124.6.

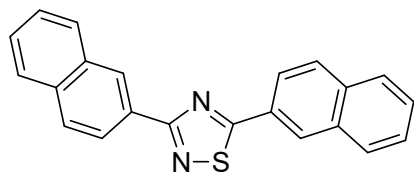

**3,5-Di(naphthalen-2-yl)-1,2,4-thiadiazole (2i)**

white solid,  $^1\text{H}$  NMR (400 MHz,  $\text{CDCl}_3$ )  $\delta$  8.98 (d,  $J = 0.8$  Hz, 1H),  $\delta$  8.62 (s, 1H),  $\delta$  8.52–8.50 (dd,  $J = 8.6, 1.8$  Hz, 1H),  $\delta$  8.15–8.13 (dd,  $J = 8.7, 1.6$  Hz, 1H),  $\delta$  8.05–7.97 (m, 4H),  $\delta$  7.92–7.89 (m, 2H),  $\delta$  7.63–7.54 (m, 4H).  $^{13}\text{C}$  NMR (100 MHz,  $\text{CDCl}_3$ )  $\delta$  188.2, 174.0, 135.0, 134.4, 133.3, 133.1, 130.3, 129.2, 129.0, 128.6, 128.4, 128.0, 127.9, 127.8, 127.7, 127.2, 127.1, 126.5, 125.2, 124.2.

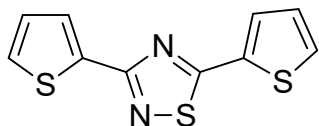

**3,5-Bis(thiophen-2-yl)-1,2,4-thiadiazole (2j)**

white solid,  $^1\text{H}$  NMR (400 MHz,  $\text{CDCl}_3$ )  $\delta$  7.94–7.92 (dd,  $J = 3.6, 1.2$  Hz, 1H),  $\delta$  7.70–7.68 (ddd,  $J = 3.8, 2.2, 1.1$  Hz, 1H),  $\delta$  7.59–7.57 (ddd,  $J = 5.0, 2.1, 1.1$  Hz, 1H),  $\delta$  7.46–7.45 (dd,  $J = 4.8, 1.1$  Hz, 1H),  $\delta$  7.17–7.13 (m, 2H).  $^{13}\text{C}$  NMR (100 MHz,  $\text{CDCl}_3$ )  $\delta$  180.7, 168.4, 136.2, 133.1, 130.5, 129.9, 129.2, 128.8, 128.4, 127.9.

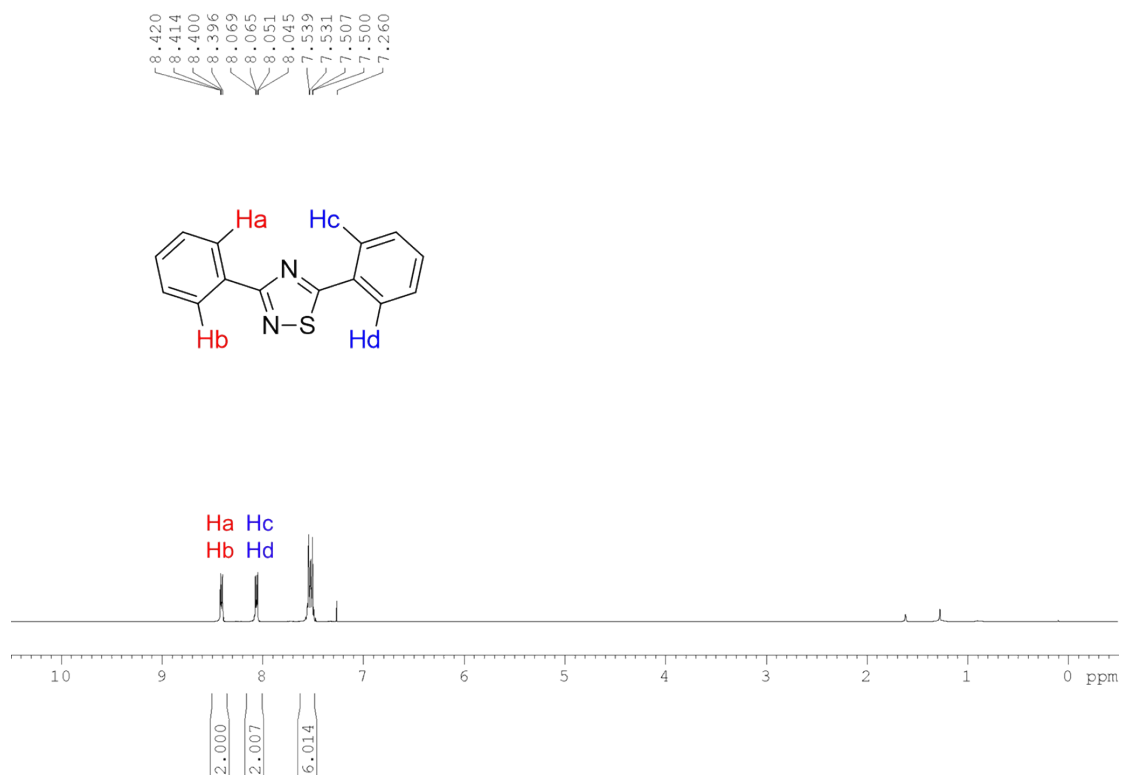

**Spectrum S1**  $^1\text{H}$  NMR spectrum of compound **2a**.

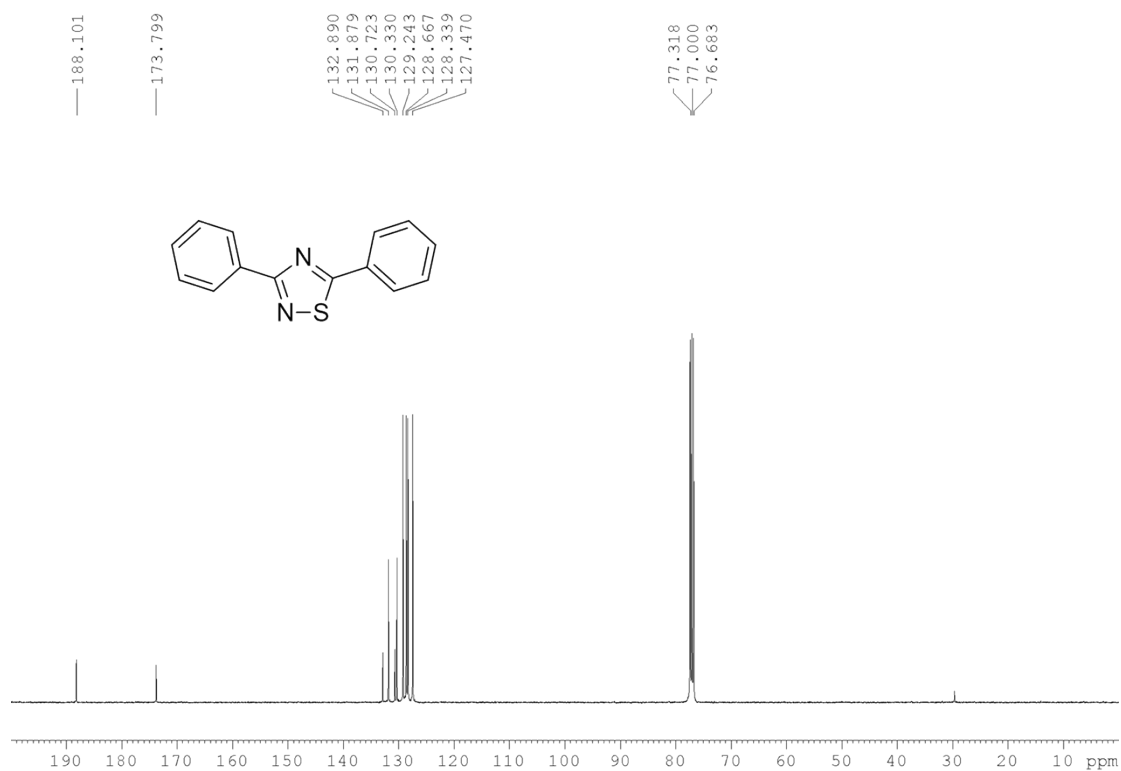

**Spectrum S2**  $^{13}\text{C}$  NMR spectrum of compound **2a**.



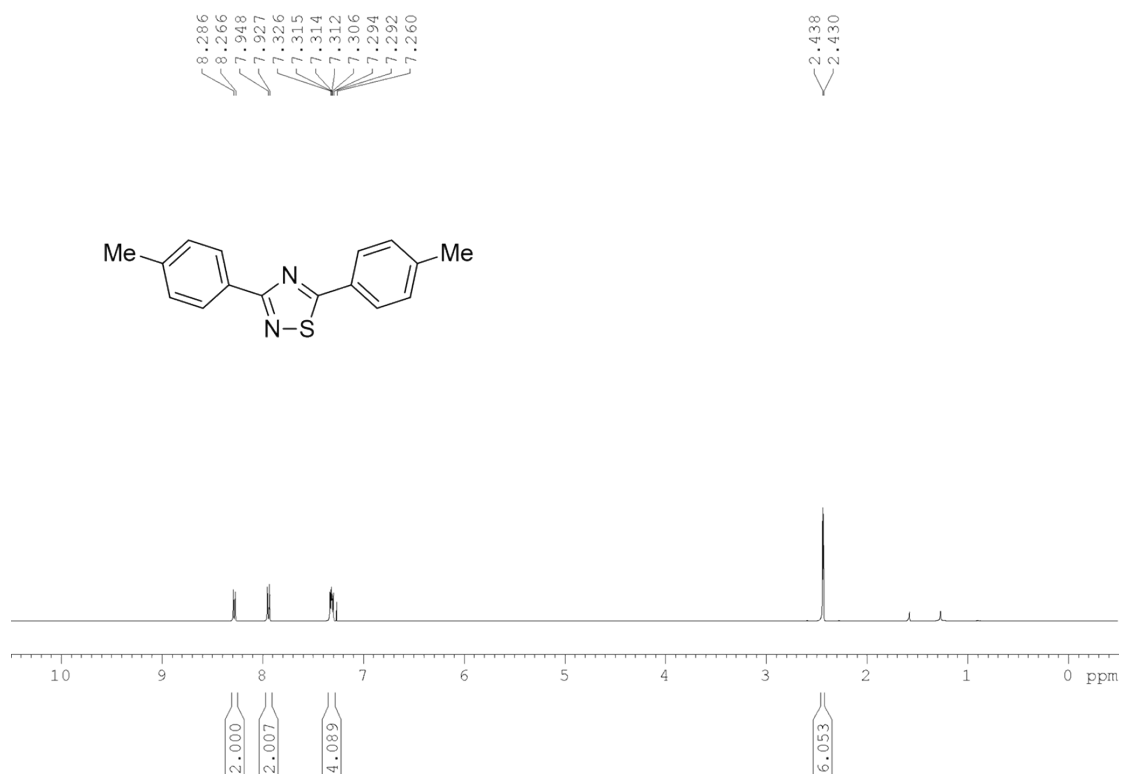

**Spectrum S3** <sup>1</sup>H NMR spectrum of compound **2b**.

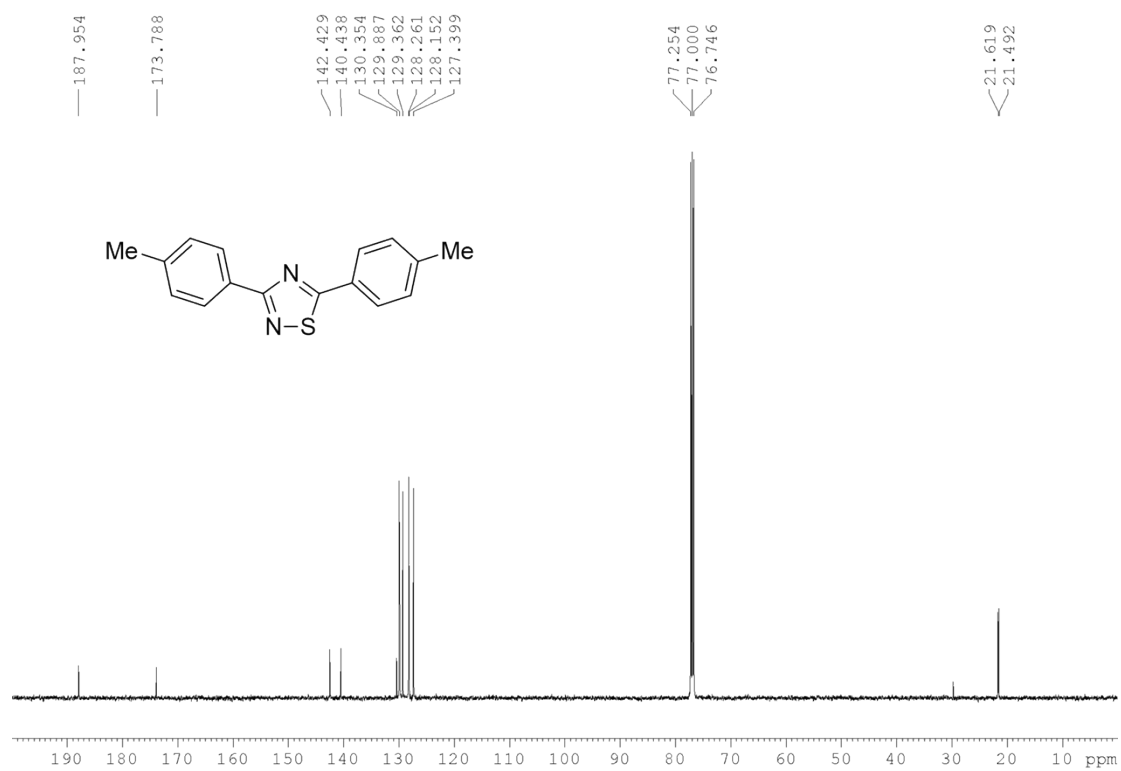

**Spectrum S4** <sup>13</sup>C NMR spectrum of compound **2b**.

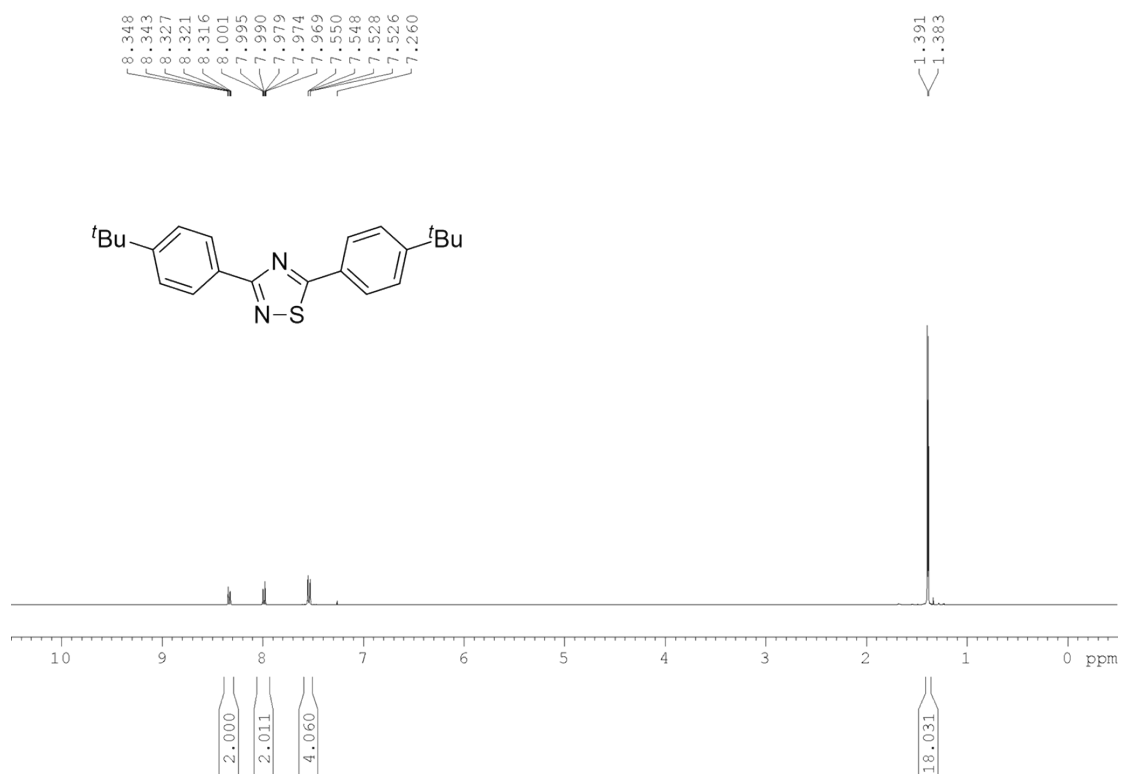

**Spectrum S5** <sup>1</sup>H NMR spectrum of compound **2c**.

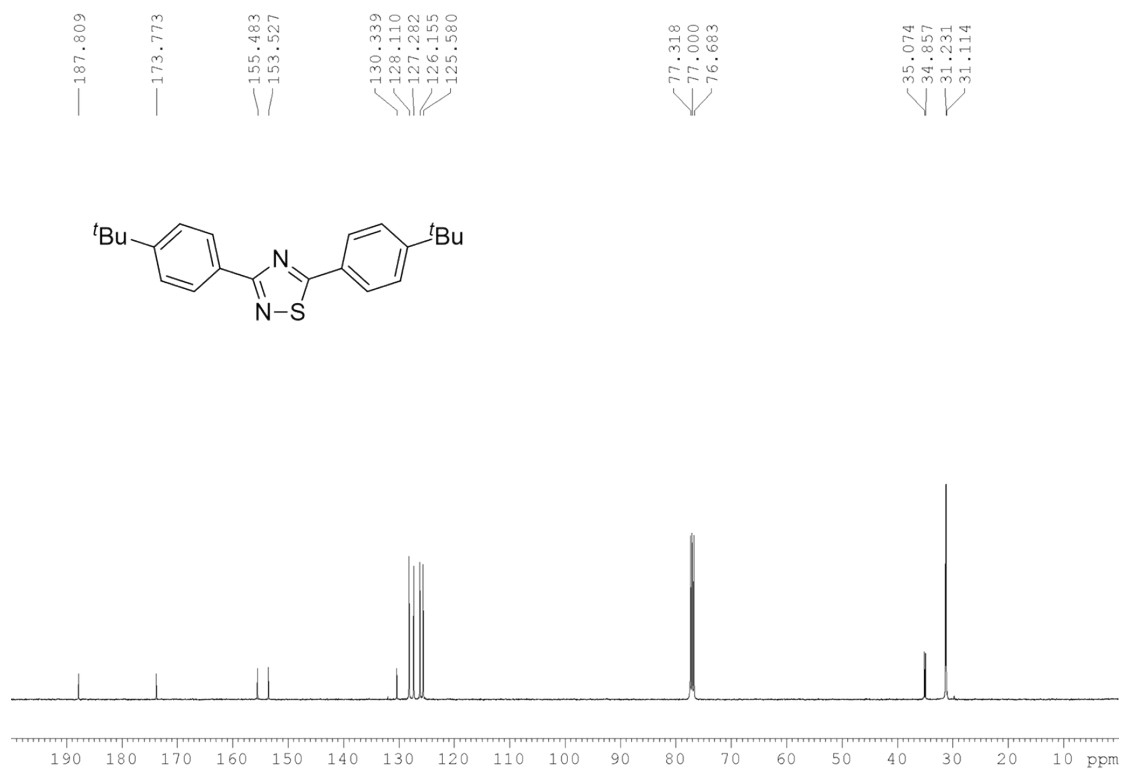

**Spectrum S6** <sup>13</sup>C NMR spectrum of compound **2c**.

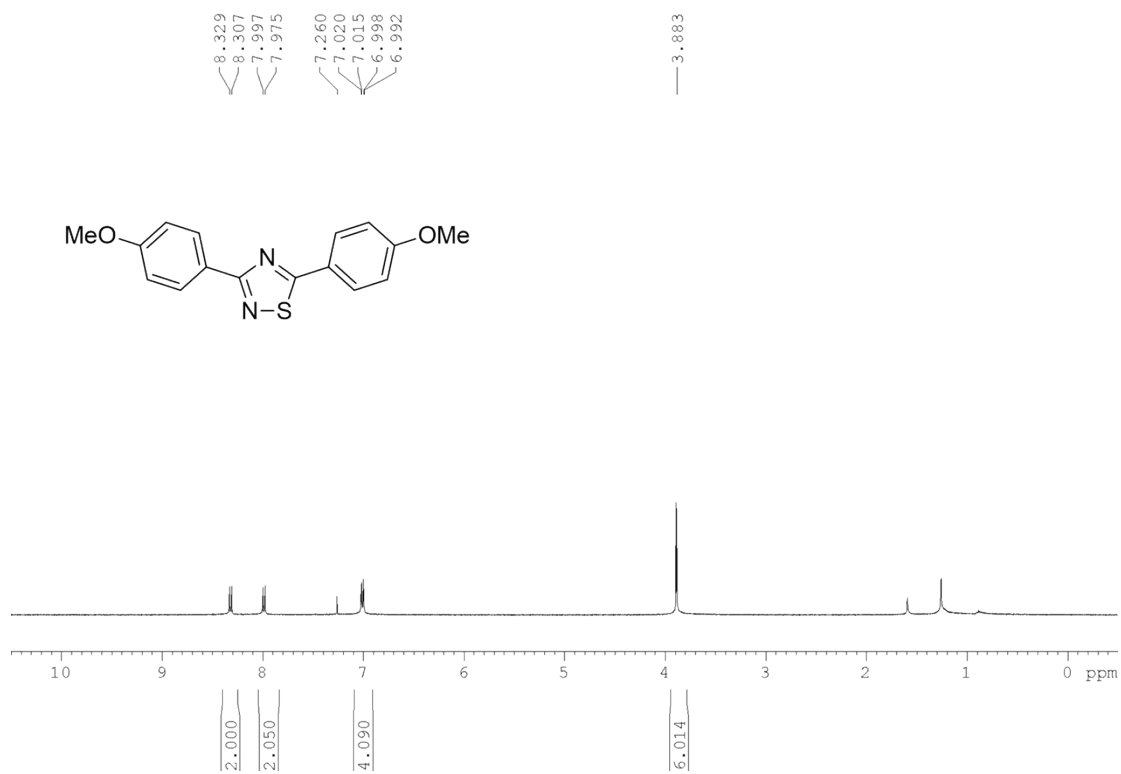

**Spectrum S7** <sup>1</sup>H NMR spectrum of compound **2d**.

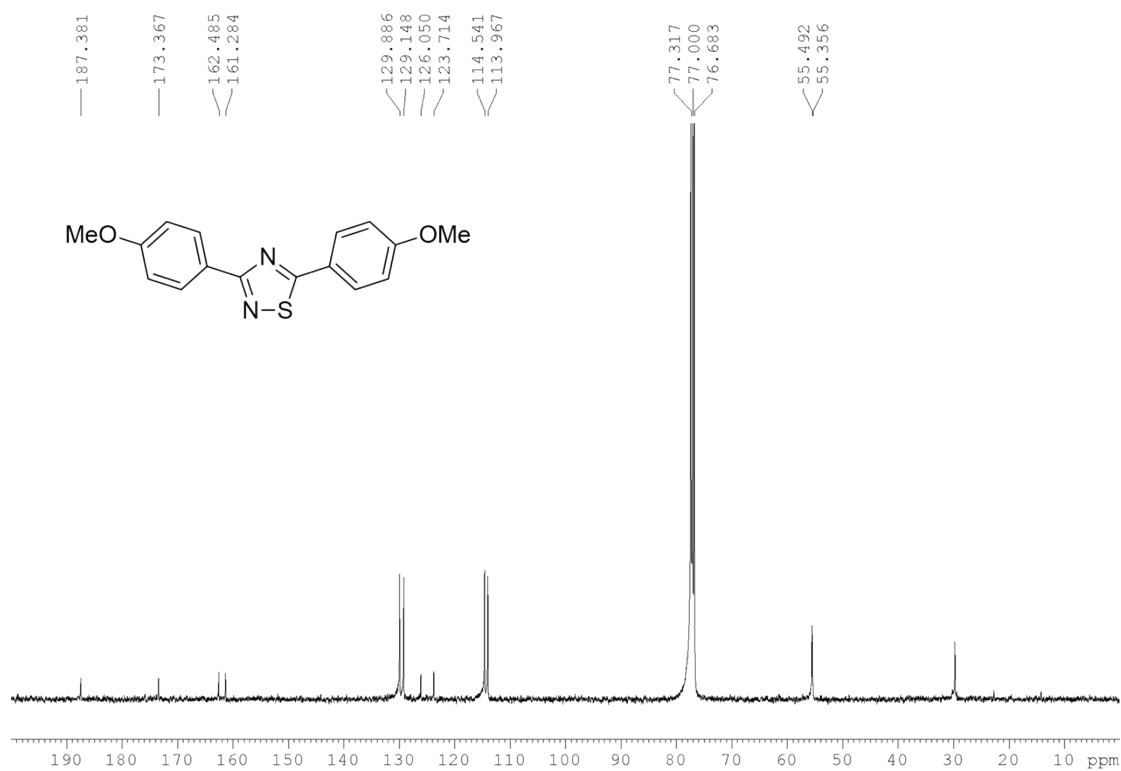

**Spectrum S8** <sup>13</sup>C NMR spectrum of compound **2d**.

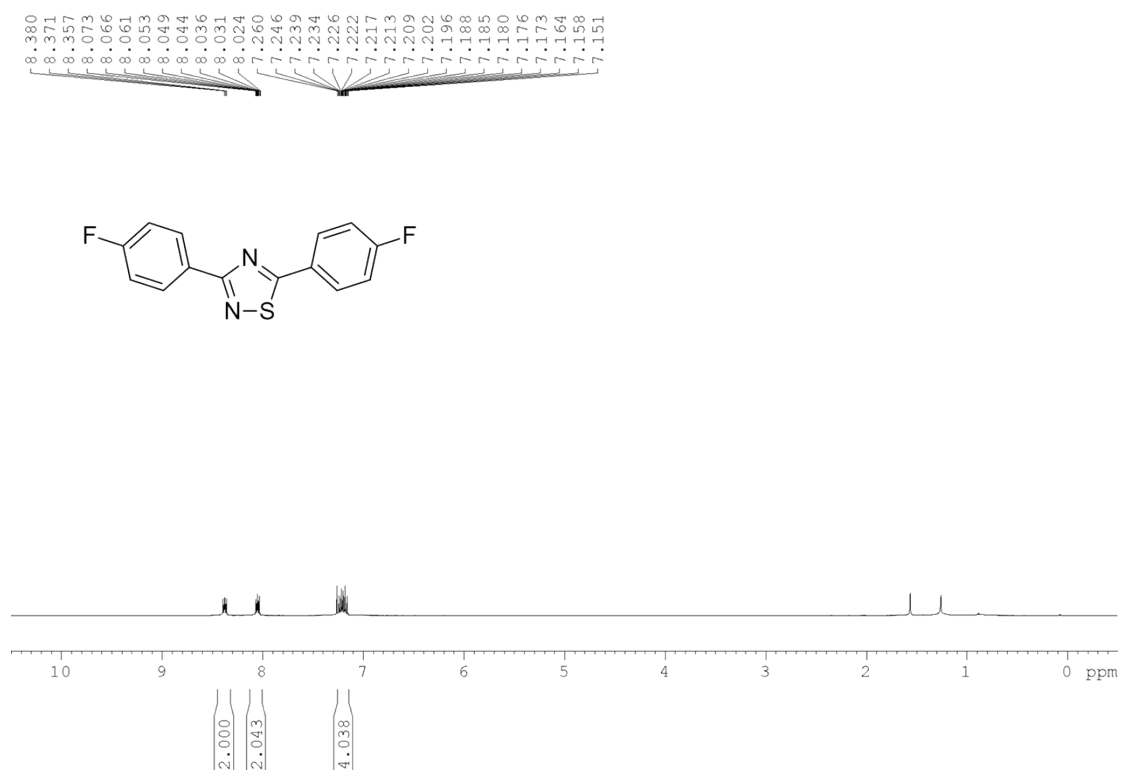

**Spectrum S9** <sup>1</sup>H NMR spectrum of compound 2e.

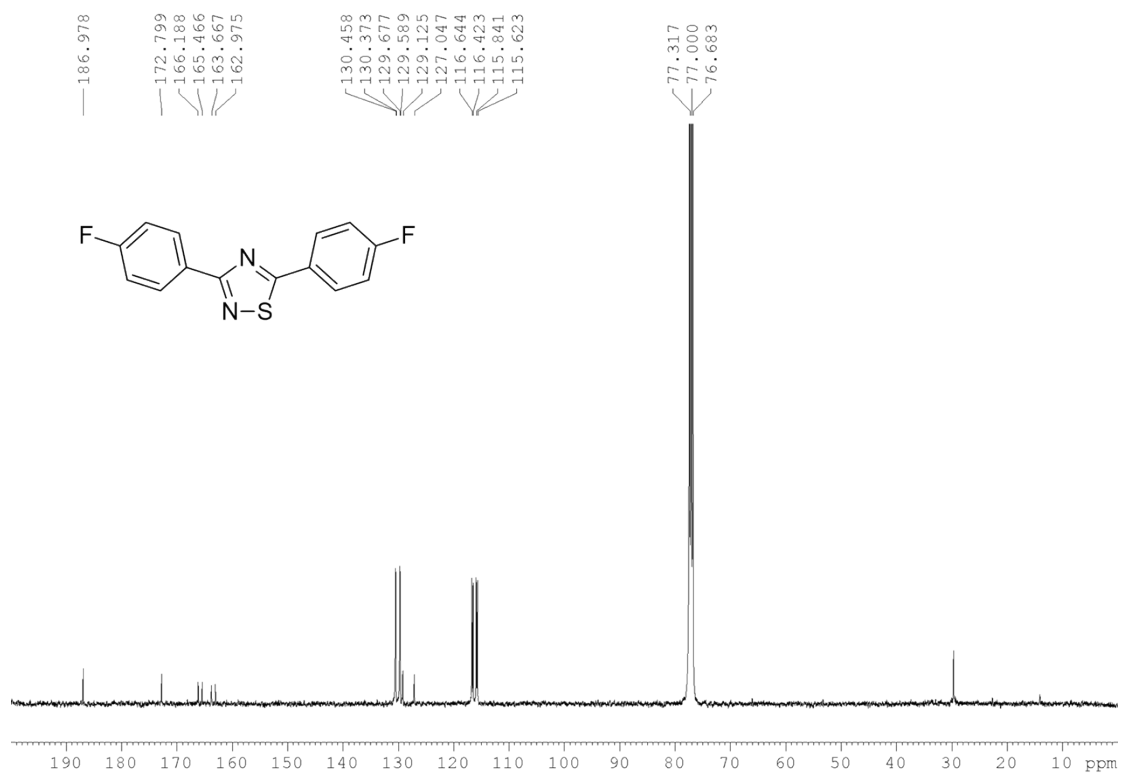

**Spectrum S10** <sup>13</sup>C NMR spectrum of compound 2e.

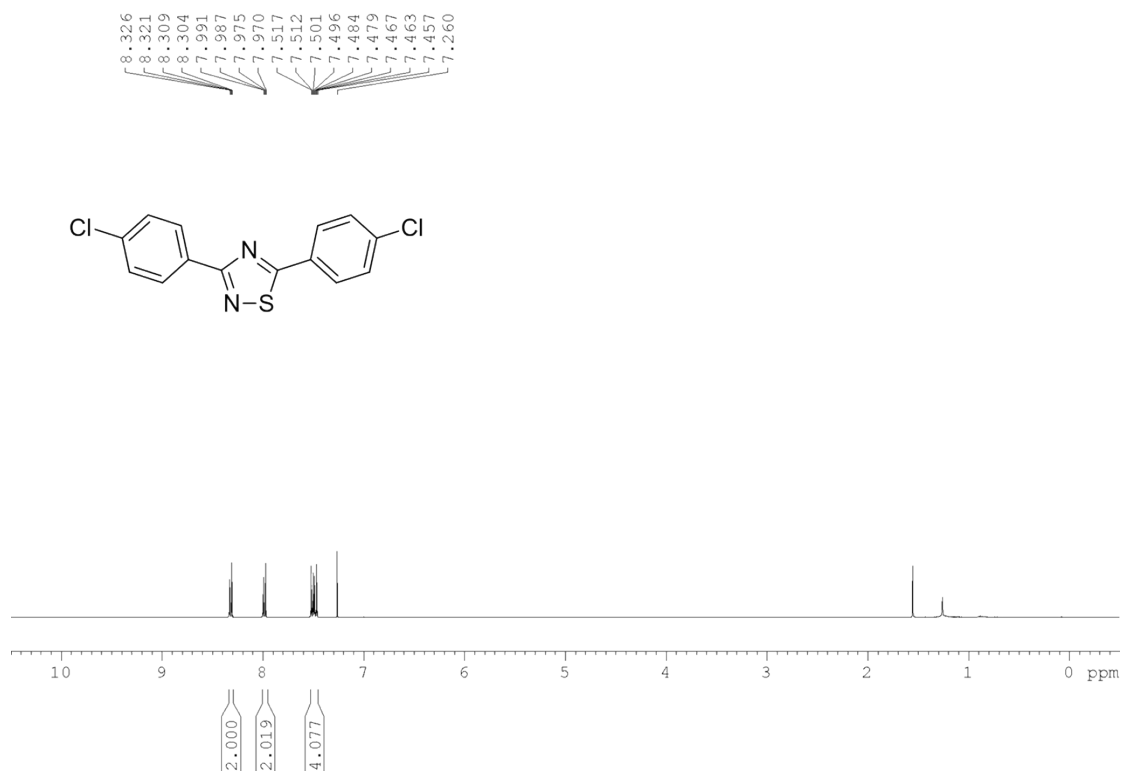

**Spectrum S11** <sup>1</sup>H NMR spectrum of compound **2f**.

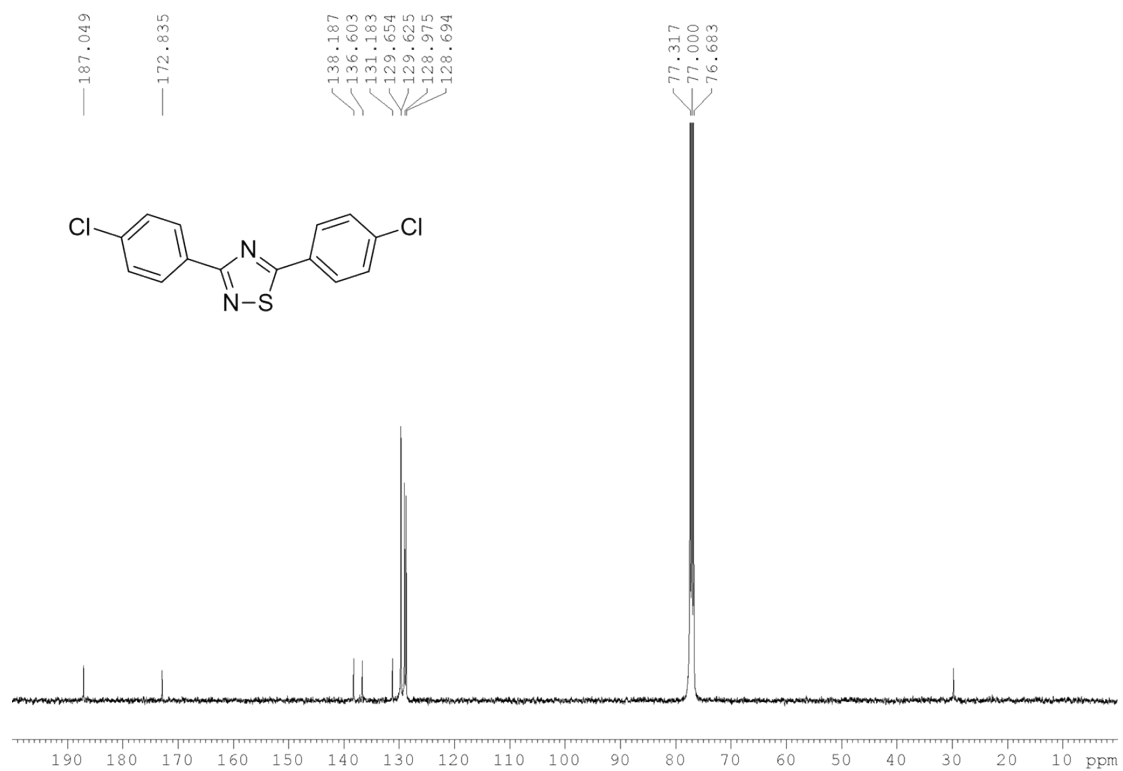

**Spectrum S12** <sup>13</sup>C NMR spectrum of compound **2f**.

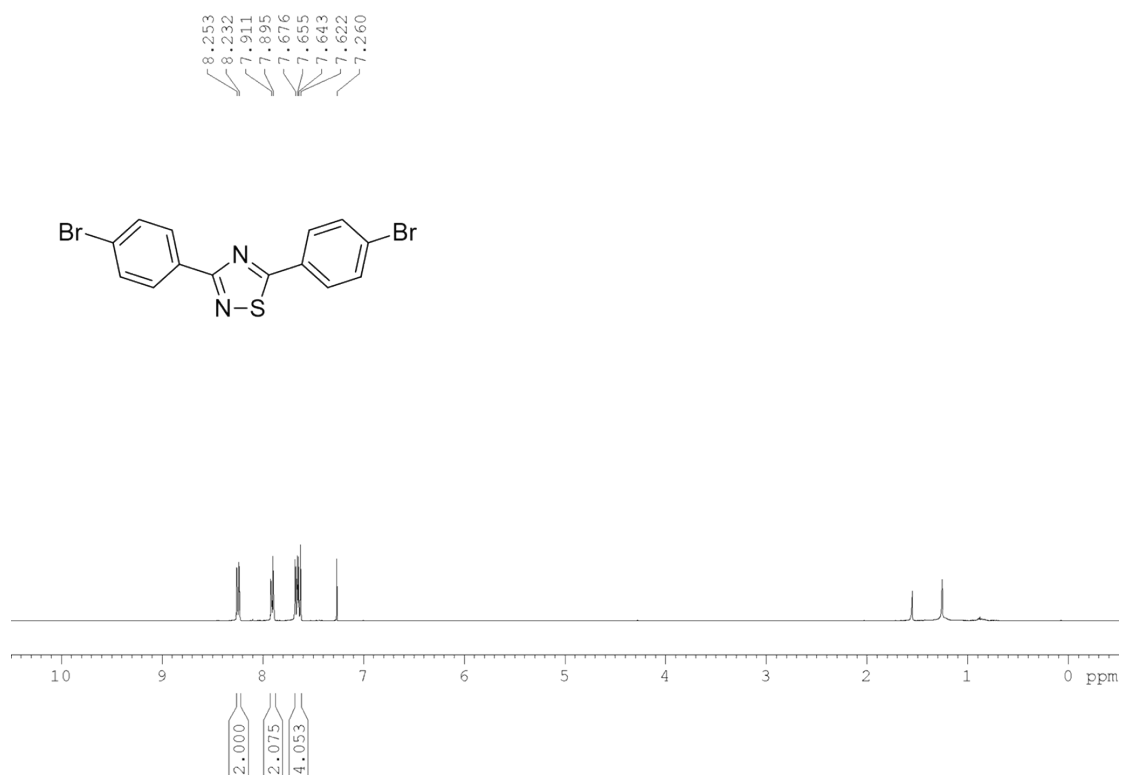

**Spectrum S13** <sup>1</sup>H NMR spectrum of compound **2g**.

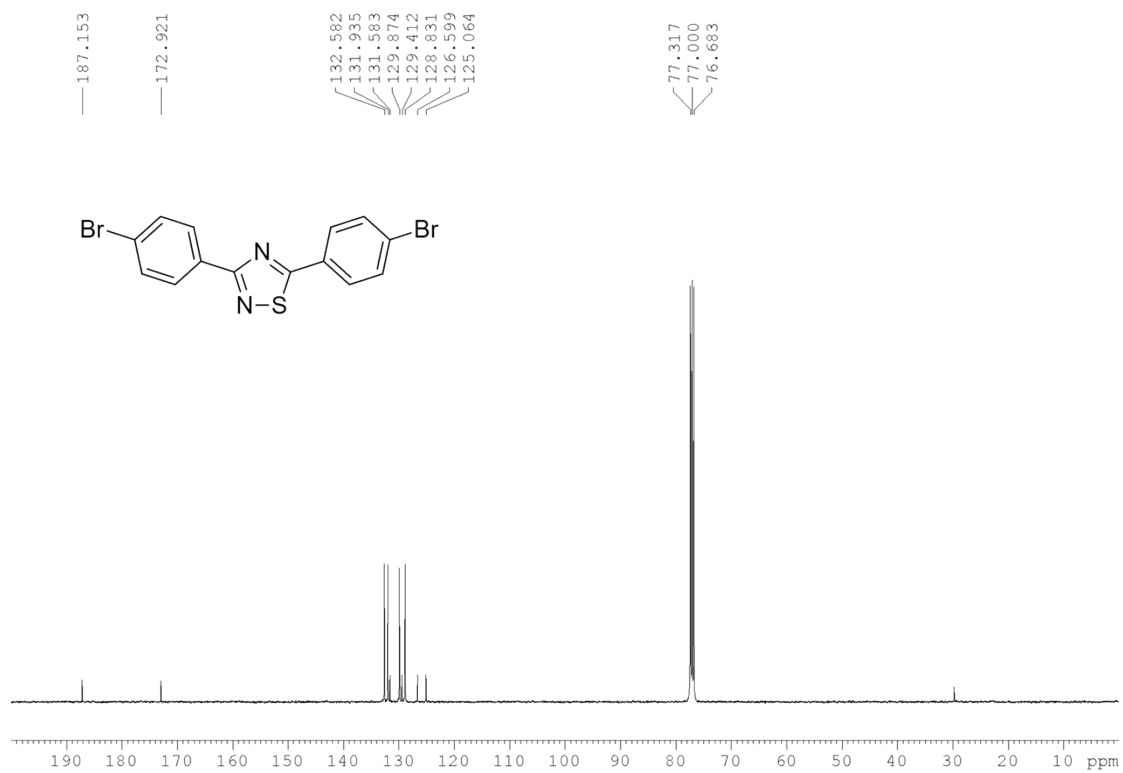

**Spectrum S14** <sup>13</sup>C NMR spectrum of compound **2g**.

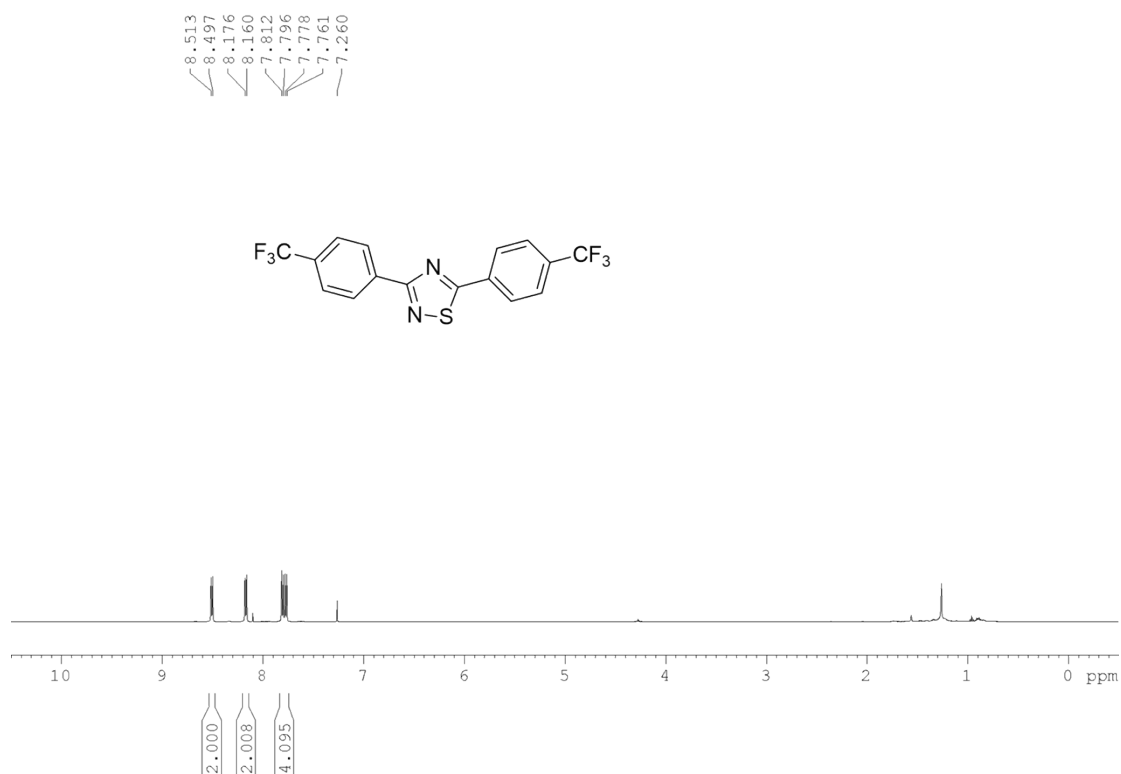

**Spectrum S15** <sup>1</sup>H NMR spectrum of compound **2h**.

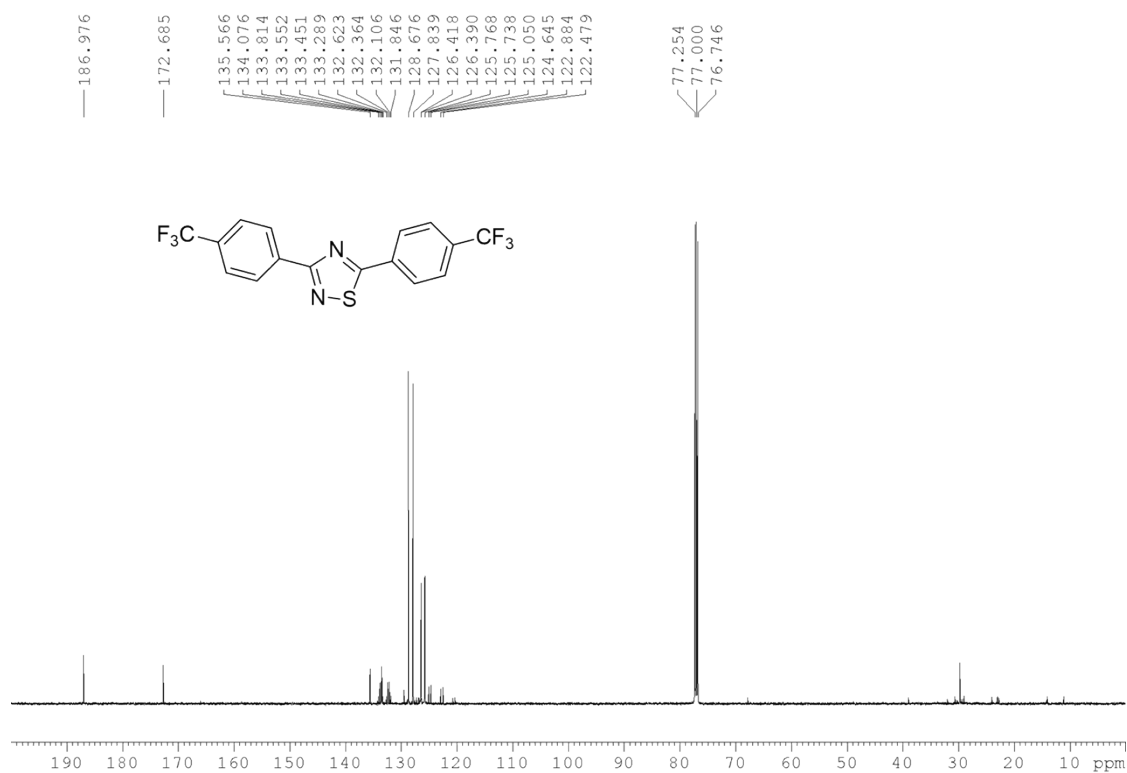

**Spectrum S16** <sup>13</sup>C NMR spectrum of compound **2h**.

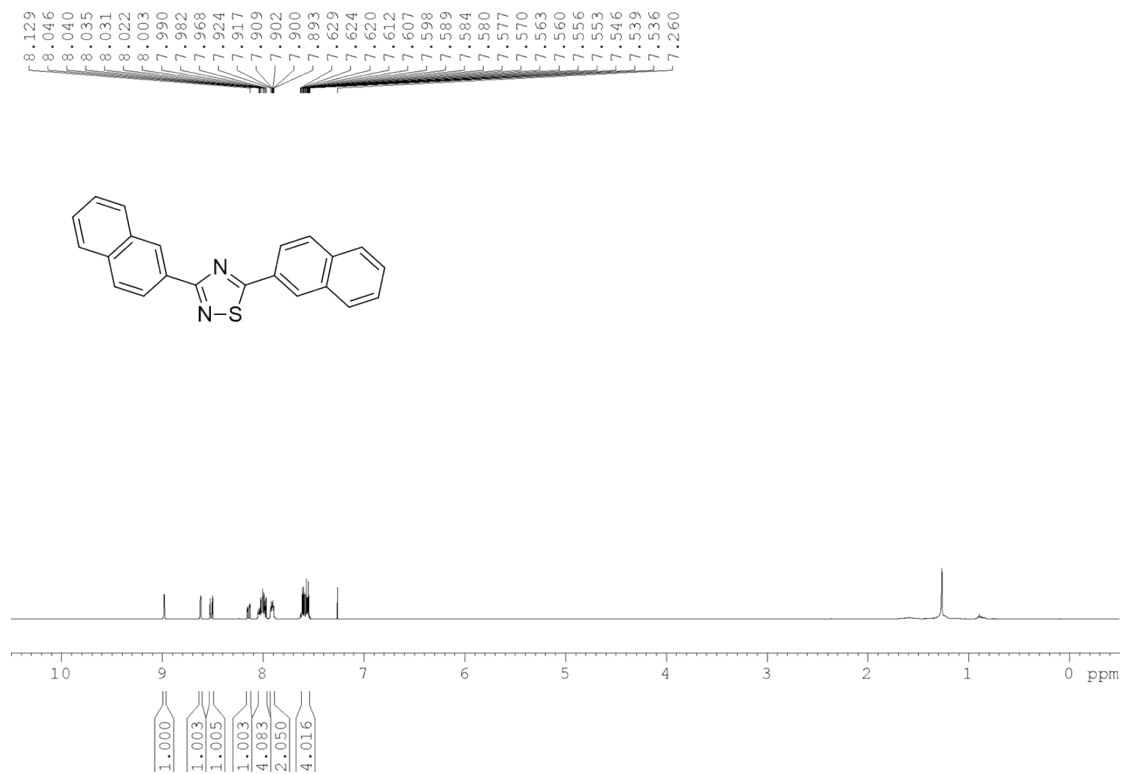

**Spectrum S17** <sup>1</sup>H NMR spectrum of compound 2i.

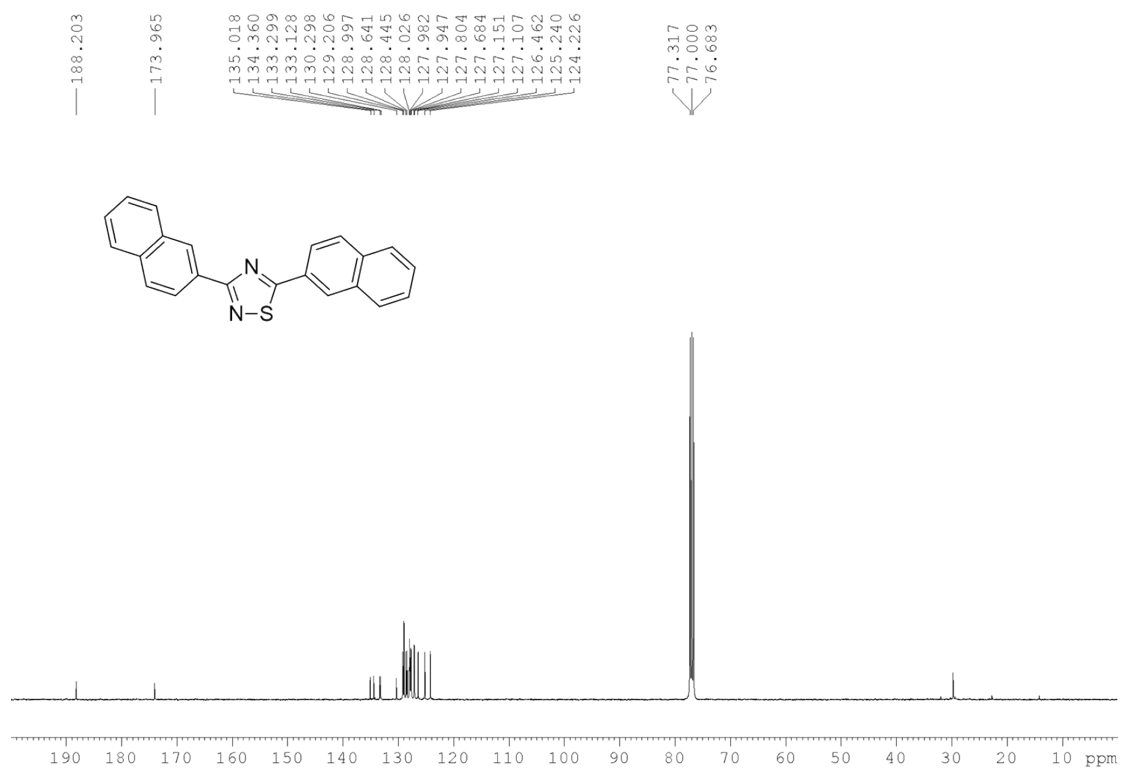

**Spectrum S18** <sup>13</sup>C NMR spectrum of compound 2i.



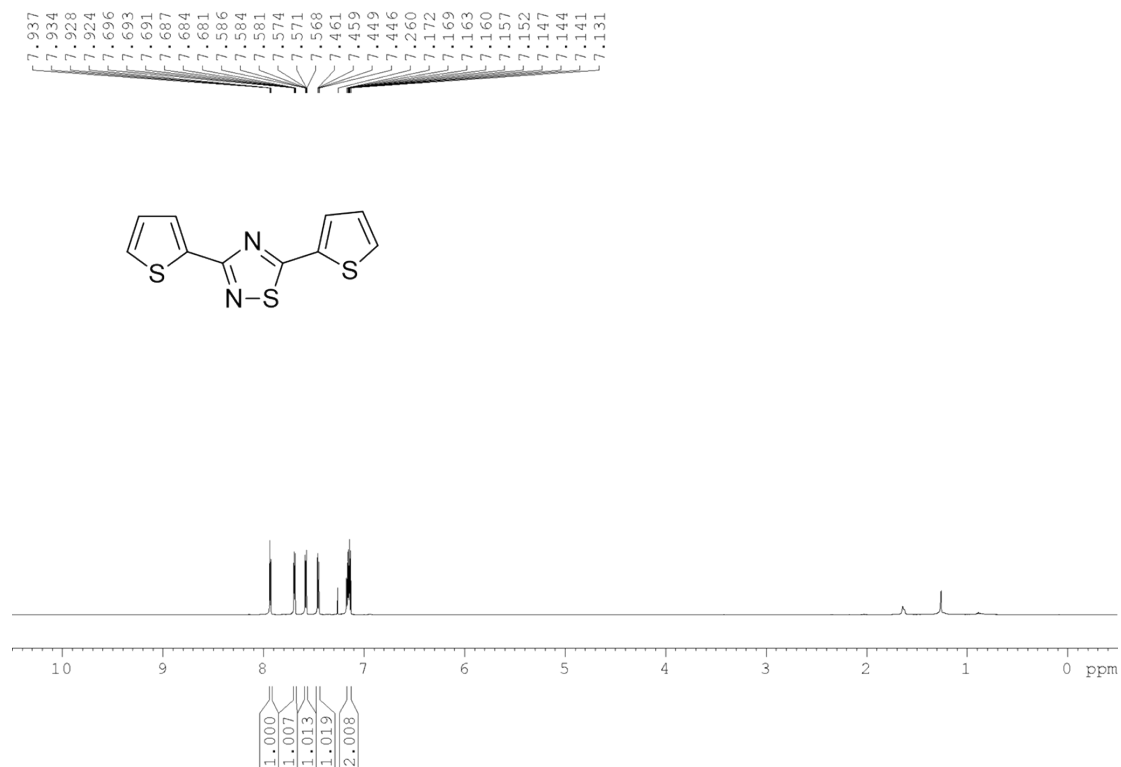

**Spectrum S19**  $^1\text{H}$  NMR spectrum of compound **2j**.

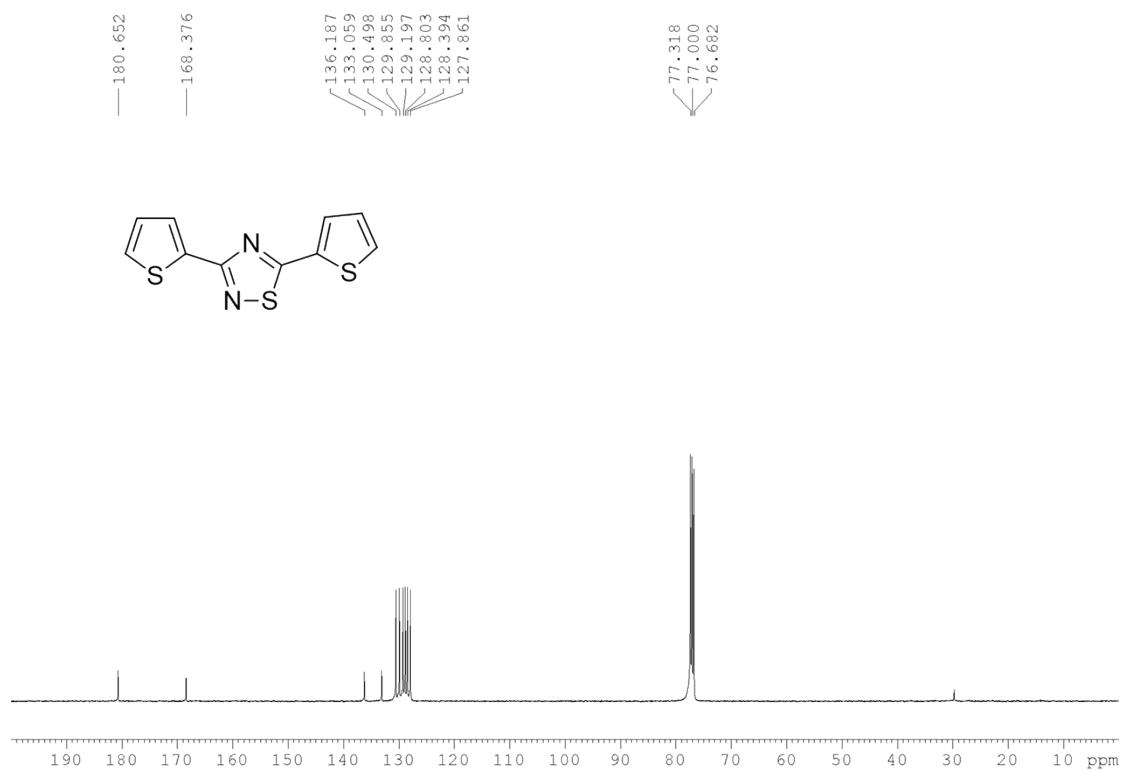

**Spectrum S20**  $^{13}\text{C}$  NMR spectrum of compound **2j**.
